# Supplementary material for: Differences in Central and Peripheral Choroidal Thickness Among the Subtypes of Age-Related Macular Degeneration
Source: Preprints.org preprint supplement (doi:10.20944/preprints202308.0810.v1), 2023-08-10
Supplement: Supplementary file 1 [file supplementary]

**Supplementary figures**

**
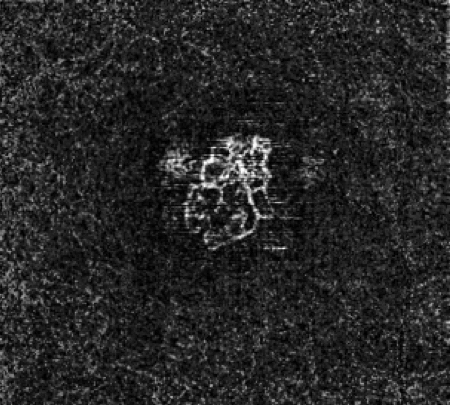
**

**Figure S1.** A representative OCTA image of PNV. MNV observed in a 3mm x 3mm OCTA image in a patient with PNV.


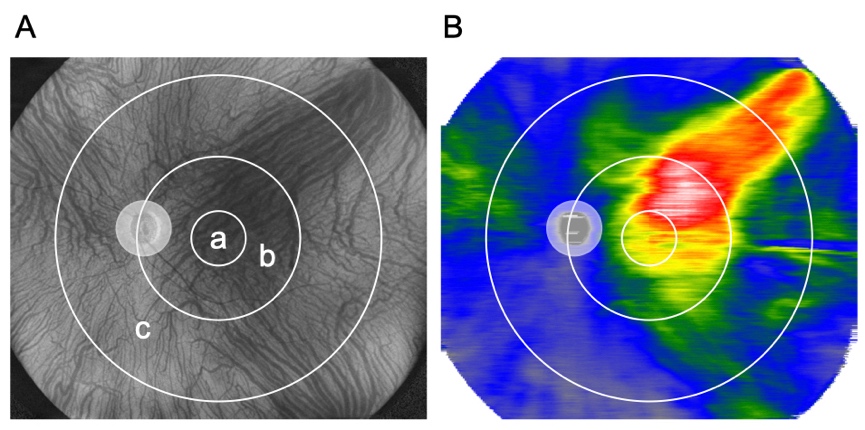


**Figure S2.** Choroidal thickness map and subfields divided by circle grids.Representative images of subfields and choroidal thickness map obtained by UWF SS-OCT. **A.** Three subfields are illustrated on an en face UWF SS-OCT image: < 3mm subfield (a), < 9mm subfield (b), and 9-18mm subfield (c) subfield. **B.** A representative image of choroidal thickness map calculated by the Bruch’s membrane to the chorioscleral interface in UWF OCT b-scans.
